# Supplementary material
Source: Preprints.org preprint supplement (doi:10.20944/preprints201903.0278.v1)
Supplement: Supplementary file 27 [file S28. Outliers of Cp(liq,298) by Vm approach.xls]

## Sheet: Tabelle1
Outliers of Cp(liq,298)
Name	Cp(liq) exp	Cp(liq) calc	Diff exp-calc	Abs(diff)	Cp(sol) calc
Benzene hexa-n-octanoate	2131.3	1747.1	384.2	384.2	1301.6
Imidazolium octanoate	769	396.6	372.4	372.4	302.7
1-Methyltetrahydrothiophenium bis(trifluoromethylsulfonyl) amide	797.368	453	344.368	344.368	344.4
Trihexyl tetradecyl phosphonium chloride	772.4	1078.5	-306.1	306.1	812.2
Tetrabutylphosphonium 2-aminoethanesulfonate	990	719.4	270.6	270.6	547.5
2,5-Dimethyl-2,4-hexadiene	459	232.5	226.5	226.5	181.3
Trihexyl tetradecyl phosphonium decanoate	1162.9	1368.8	-205.9	205.9	1035.4
Tris(perfluorobutyl)amine	418.4	621.5	-203.1	203.1	474
Tetrabutylphosphonium L-cysteinate	920	723.6	196.4	196.4	551.4
1-Ethyltetrahydrothiophenium bis(trifluoromethylsulfonyl) amide	687.5	491.7	195.8	195.8	376.4
Tetrabutylphosphonium L-lysinate	1000	807.3	192.7	192.7	613.5
Trihexyl tetradecyl phosphonium octanoate	1135.6	1310.4	-174.8	174.8	991.5
1,2-Dipiperazinylethane	539.7	369	170.7	170.7	282.3
1-Decyl-4-amino-1,2,4-triazolium nitrate	342.4	507.5	-165.1	165.1	384.7
1-Hexadecyl-3-methylimidazolium bis(trifluoromethanesulfonyl) amide	1084	919.9	164.1	164.1	682.8
N,N-Diethylhydroxylamine	370.8	214.3	156.5	156.5	138.4
Acetophenone diethyl ketal	210	360.8	-150.8	150.8	278.1
1-Methyltetrahydrothiophenium saccharinate	573.614	426.8	146.814	146.814	325
Tricyclo(5,0(2,6))decane	236.6	380.3	-143.7	143.7	290.6
1-Octyl-4-amino-1,2,4-triazolium nitrate	305.65	446.7	-141.05	141.05	339.7
1-(3-Cyanopropyl)-2,3-dimethylimidazolium bis(trifluoromethylsulfonyl) amide	715	574.2	140.8	140.8	438.4
2-Ethoxyethylacetate	376	237.8	138.2	138.2	185.3
Ethane	210.9	74.1	-136.8	136.8	65.4
Methyltributylammonium lysinate	824	690.2	133.8	133.8	525.5
Trihexyl tetradecyl phosphonium hexanoate	1118.4	1250.9	-132.5	132.5	947.3
Tetrabutylphosphonium L-threoninate	961	832	129	129	610
Trihexyl tetradecyl phosphonium dicyanamide	1024.9	1150.7	-125.8	125.8	860.5
N-(2-Aminoethyl)-N'-((2-aminoethyl)-2-aminoethyl)piperazine	528.9	406.8	122.1	122.1	312.6
1-Buyltetrahydrothiophenium bis(trifluoromethylsulfonyl) amide	680.688	561.7	118.988	118.988	422.2
1-Hexyl-4-amino-1,2,4-triazolium nitrate	269.25	385.8	-116.55	116.55	294.7
Trihexyl tetradecyl phosphonium butyrate	1095.1	1208.8	-113.7	113.7	903.5
1-Tetradecyl-3-methylimidazolium bis(trifluoromethanesulfonyl) amide	971.6	860.1	111.5	111.5	639
4-Heptoxyphenyl 4'-butylbenzoate	793.3	682.3	111	111	514
1-Ethyl-3-methylpyridinium bis(trifluoromethylsulfonyl)amide	630.5	520.6	109.9	109.9	392.2
1-Butyl-4-amino-1,2,4-triazolium dicyanamide	253.75	360.2	-106.45	106.45	274.8
1-Pentyl-4-amino-1,2,4-triazolium nitrate	250.45	355.3	-104.85	104.85	272.2
Acetic acid 2-methoxyethylester	310	206.6	103.4	103.4	162.2
Tetra-1-dodecoxysilane	1678.85	1576.5	102.35	102.35	773.4
Tributylphosphate	379.4	481.5	-102.1	102.1	365.5
1-Hexyl-3-methylimidazolium dicyanoamide	534	433	101	101	328.1
Octatetracontane	1594.1	1496.8	97.3	97.3	1116.4
Perfluorobutane	127.2	224.1	-96.9	96.9	175.1
1-(3-Trimethylammonioprop-1-yl)-3-methylimidazolium bis(dicyanamide)	519.431	615.7	-96.2691	96.2691	438.1
Hexatriacontane	1205	1109.2	95.8	95.8	842
1-Butyl-4-amino-1,2,4-triazolium nitrate	228.65	323.8	-95.15	95.15	248.9
Tritriacontane	1112.5	1018.1	94.4	94.4	773.4
1-Pentylpyridinium hexafluorophosphate	345.25	439.3	-94.05	94.05	318.2
1-(2,2,3-Trimethyl-1,3-oxazolidin-5-yl)-butane-1,2,3,4-tetrol	546.792	453.8	92.9921	92.9921	321.3
1-Ethylazepanium ethosulfate	341.544	430.2	-88.6561	88.6561	327.6
1-(2-Propionyloxyethyl)-4-amino-1,2,4-triazolium nitrate	280.6	369	-88.4	88.4	282.3
1-(3-Cyanopropyl)-pyridinium bis(trifluoromethylsulfonyl) amide	632	545	87	87	413.5
4-Chloro-1,3-dioxolan-2-one	238.1	151.2	86.9	86.9	121.2
1-(2-Acetoxyethyl)-4-amino-1,2,4-triazolium nitrate	257	342.8	-85.8	85.8	262.9
Ethyl 2-methylbutyrate	327.4	242.6	84.8	84.8	188.8
1-Methyl-3-decylimidazolium saccharinate	774.6	689.9	84.7	84.7	525.5
n-Hexadecanoic acid	677.8	593.2	84.6	84.6	427.6
N,N'-Di-(2-aminoethyl)piperazine	407.1	323.6	83.5	83.5	250.2
1-(2-Acetoxyethyl)-4-amino-1,2,4-triazolium nitrate	257	340.1	-83.1	83.1	262.5
Perfluoropentane	188.3	271.1	-82.8	82.8	210.9
1-Octadecyl-3-methylimidazolium bis(trifluoromethanesulfonyl) amide	1052	969.9	82.1	82.1	731.3
1-Butyl-1-methylpyrrolidinium tris(pentafluoroethyl)trifluorophosphate	769	690.3	78.7	78.7	525.8
Perfluorohexane	240.2	318.2	-78	78	246.4
Methyltributylammonium L-threoninate	753	676.2	76.8	76.8	498.4
Tetrabutylammonium docusate	1324	1248.3	75.7	75.7	945.3
1-Octyl-3-methylpyridinium tetrafluoroborate	589	513.8	75.2	75.2	391.5
Dodecylcyclohexane	615.5	541.3	74.2	74.2	414.4
Octacosane	937.2	866.2	71	71	659
1-Methyl-3-octylimidazolium saccharinate	702.2	631.6	70.6	70.6	479.2
1-Eicosanethiol	725.9	656.4	69.5	69.5	500.4
4-Chloromethyl-1,3-dioxolan-2-one	248.1	180.6	67.5	67.5	142.8
cis-3-Methylcyclohexanol	199.6	266.5	-66.9	66.9	178.6
1-Hexyl-3-methylpyridinium bromide	343	409.9	-66.9	66.9	315.5
Trielaidin	1841.76	1775.1	66.66	66.66	1341.3
N-((2-Aminoethyl)-2-aminoethyl)piperazine	391	325.4	65.6	65.6	251.5
trans-4-Methylcyclohexanol	202.1	266.5	-64.4	64.4	178.6
2,2,4,4,6,6-Hexamethylcyclotrisilazane	428	364.4	63.6	63.6	281.2
1-Octyl-3-methylpyridinium tetrafluoroborate	450.5	513.8	-63.3	63.3	391.5
Pentaethylene glycol dimethyl ether	547.44	484.7	62.74	62.74	371.2
1-(3-Cyanopropyl)-2,3-dimethylimidazolium chloride	282	343.1	-61.1	61.1	264.3
Triethanolamine	389	327.9	61.1	61.1	215.5
