# Supplementary material
Source: Preprints.org preprint supplement (doi:10.20944/preprints201903.0278.v1)
Supplement: Supplementary file 28 [file S29. Outliers of Cp(sol,298) by Vm approach.xls]

## Sheet: Tabelle1
Outliers of Cp(sol,293)
Name	Cp(sol) exp	Cp(sol) calc	Diff exp-calc		Cp(liq) calc
Benzene hexa-n-octanoate	2131.3	1294.6	836.7	836.7	1747.1
1-Aceto-3-stearin	938.5	627.5	311	311	858
Naphthalene-1,8-disulfide S-oxide	518	217.9	300.1	300.1	282.4
4,4'-Bis(maleimidophenyl)methane	118	407	-289	289	539.6
Benzene hexa-n-hexanoate	1294.9	1021.6	273.3	273.3	1375.7
1,2-Diaceto-3-stearin	904.057	635.6	268.457	268.457	842.5
N-Benzyl-pivalophenone imine	588.206	349.2	239.006	239.006	460.9
Capric acid	475.59	272.9	202.69	202.69	394.4
Octamethyltetrasilazane	569.9	367.6	202.3	202.3	480.7
Tetracosane	730.9	565	165.9	165.9	754.6
Tritriacontane	900.8	769.7	131.1	131.1	1033
Tetra-1-hexoxysilane	765.92	641.9	124.02	124.02	859.2
N-Phenyl 4-nitrobenzaldimine	398.182	276.1	122.082	122.082	359.3
Di-n-octylammonium chloride	550.2	436.8	113.4	113.4	580.1
1-(2,4-Dinitrophenyl)-3,3-dinitroazetidine	422.24	312.9	109.34	109.34	408.7
Triacontane	808.8	701.4	107.4	107.4	926.9
Pentatriacontane	915.9	815	100.9	100.9	1078.7
Fenoxycarb	280.28	380.3	-100.02	100.02	503.2
4-Nitroanisol	279.9	184	95.9	95.9	235.5
Tetratriacontane	887.4	792.4	95	95	1048.5
Glucamine	330	235.8	94.2	94.2	355.4
2,4-Dinitrobenzaldehyde	111.83	204.6	-92.77	92.77	264.3
N-Phenylbenzophenone imine	429.76	338.1	91.66	91.66	445.9
Tetraiodomethane	259.8	168.2	91.6	91.6	214.2
Tetra-1-pentoxysilane	621.56	551	70.56	70.56	725.8
2,2'-Diaminodiphenyldisulfide	223.8	293.7	-69.9	69.9	382
Tetra-2-pentoxysilane	610.23	543.1	67.13	67.13	715.2
2-Methyl-3-amino-4-methoxymethyl-5-aminomethylpyridine	307.1	240.2	66.9	66.9	310.5
N-Methylglucamine	330	266.3	63.7	63.7	378.7
