# Supplementary material
Source: Preprints.org preprint supplement (doi:10.20944/preprints201903.0278.v1)
Supplement: Supplementary file 34 [file Table 14.doc]

| **Molecules class** | **N** | **Corr. coeff. R2** | **(J/mol/K)** | **Intercept** | **Slope** |
| --- | --- | --- | --- | --- | --- |
| OH-free compounds | 555 | 0.9766 | 23.14 | 2.8899 | 1.3669 |
| All alcohols/acids, sugars | 242 | 0.9792 | 20.87 | -14.7861 | 1.5364 |
| Monoalcohols/-acids | 123 | 0.9613 | 21.62 | -11.2179 | 1.5050 |
| Polyalcohols/-acids, sugars | 119 | 0.9866 | 19.75 | -14.9656 | 1.5462 |
