# Supplementary material
Source: Preprints.org preprint supplement (doi:10.20944/preprints201903.0278.v1)
Supplement: Supplementary file 35 [file Table 15.doc]

**Table 15**. Statistics of liquid heat capacities of OH-free compounds at various temperatures

| **Cp at various K** | **N** | **Corr. coeff. R2** | **(J/mol/K)** | **Intercept** | **Slope** |
| --- | --- | --- | --- | --- | --- |
| Cp(liq,250) | 29 | 0.9588 |  | -10.8602 | 1.7137 |
| Cp(liq,275) | 43 | 0.9765 |  | -14.8530 | 1.7887 |
| Cp(liq,298) | 1100 | 0.9893 |  | -6.8820 | 1.8302 |
| Cp(liq,325) | 94 | 0.9860 |  | -12.6937 | 1.9223 |
| Cp(liq,350) | 87 | 0.9842 |  | -4.3295 | 1.9458 |
