# Supplementary material
Source: Preprints.org preprint supplement (doi:10.20944/preprints201903.0278.v1)
Supplement: Supplementary file 36 [file Table 16.doc]

**Table 16**. Statistics of liquid heat capacities of OH-carrying compounds at various temperatures

| **Cp at various K** | **N** | **Corr. coeff. R2** | **(J/mol/K)** | **Intercept** | **Slope** |
| --- | --- | --- | --- | --- | --- |
| Cp(liq,250) | 10 | 0.9702 |  | 7.4825 | 1.7070 |
| Cp(liq,275) | 36 | 0.8988 |  | 0.0897 | 1.9866 |
| Cp(liq,298) | 203 | 0.9696 |  | 17.7056 | 1.9911 |
| Cp(liq,325) | 59 | 0.9337 |  | 35.6984 | 2.0297 |
| Cp(liq,350) | 56 | 0.9605 |  | 39.5214 | 2.1639 |
