# Supplementary material
Source: Preprints.org preprint supplement (doi:10.20944/preprints201903.0278.v1)
Supplement: Supplementary file 37 [file Table 17.doc]

**Table 17**. Statistics of solid heat capacities of OH-free compounds at various temperatures

| **Cp at various K** | **N** | **Corr. coeff. R2** | **(J/mol/K)** | **Intercept** | **Slope** |
| --- | --- | --- | --- | --- | --- |
| Cp(sol,250) | 81 | 0.9873 |  | 8.8062 | 1.1569 |
| Cp(sol,275) | 83 | 0.9883 |  | 5.5180 | 1.2659 |
| Cp(sol,298) | 559 | 0.9760 |  | 2.6919 | 1.3694 |
| Cp(sol,325) | 60 | 0.9721 |  | -1.7976 | 1.4837 |
| Cp(sol,350) | 43 | 0.9711 |  | -5.6718 | 1.5794 |
