# Supplementary material
Source: Preprints.org preprint supplement (doi:10.20944/preprints201903.0278.v1)
Supplement: Supplementary file 38 [file Table 18.doc]

**Table 18**. Statistics of solid heat capacities of OH-carrying compounds at various temperatures

| **Cp at various K** | **N** | **Corr. coeff. R2** | **(J/mol/K)** | **Intercept** | **Slope** |
| --- | --- | --- | --- | --- | --- |
| Cp(sol,250) | 43 | 0.9916 |  | -12.6827 | 1.2778 |
| Cp(sol,275) | 42 | 0.9846 |  | -1.1741 | 1.3387 |
| Cp(sol,298) | 241 | 0.9743 |  | -12.6463 | 1.5236 |
| Cp(sol,325) | 55 | 0.9859 |  | -11.7895 | 1.6305 |
| Cp(sol,350) | 36 | 0.9846 |  | -26.4116 | 1.8402 |
