# Supplementary material
Source: Preprints.org preprint supplement (doi:10.20944/preprints201903.0278.v1)
Supplement: Supplementary file 47 [file Table 8.doc]

| **Molecules class** | **N** | **Corr. coeff. R2** | **(J/mol/K)** | **Intercept** | **Slope** |
| --- | --- | --- | --- | --- | --- |
| OH-free compounds | 1102 | 0.9890 | 20.70 | -5.3055 | 1.8183 |
| All alcohols/acids | 201 | 0. 9724 | 23.24 | 20.9141 | 1.9676 |
| Monoalcohols/-acids | 164 | 0. 9685 | 22.91 | 23.3101 | 1.9282 |
| Polyalcohols/-acids | 36 | 0.9910 | 16.03 | 23.5782 | 2.0422 |
